# Supplementary material for: Engineering cell sensing and responses using a GPCR-coupled CRISPR-Cas system
Source: PubMed Central journal article supplement (PMC5738360; doi:10.1038/s41467-017-02075-1), 2017-12-20
Supplement: 41467_2017_2075_MOESM1_ESM.pdf [file 41467_2017_2075_MOESM1_ESM.pdf]

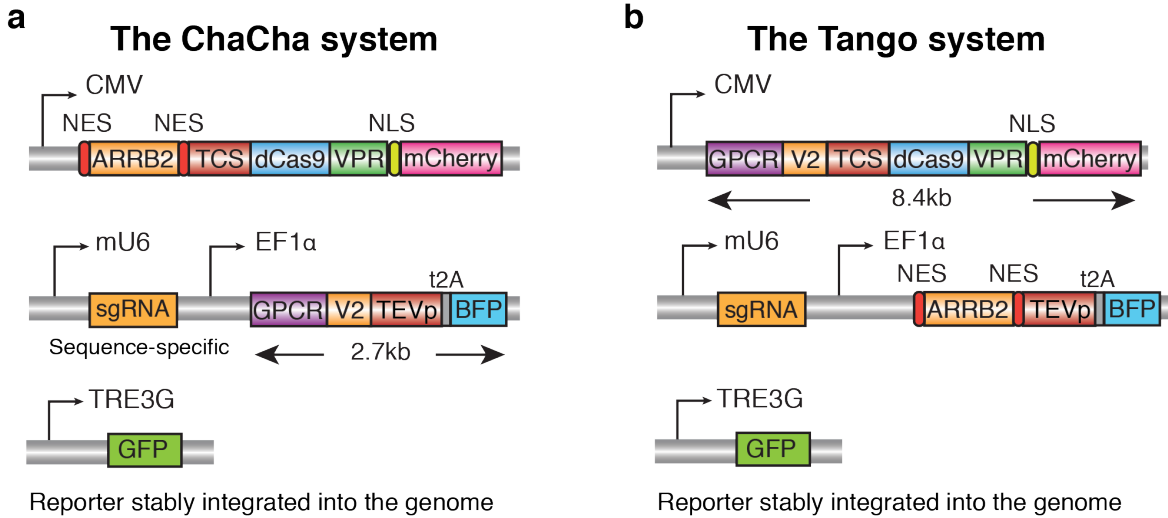

**Supplementary Figure 1 | The plasmids used for the GPCR-CRISPR ChaCha and the GPCR-CRISPR Tango systems.** (a) The plasmids for the GPCR-CRISPR ChaCha system. The dCas9-VPR effector is fused to the C-terminus of a nuclear export signal (NES)-flanked Beta-Arrestin 2 (ARRB2) with a TEV protease cleavage site (TCS), and a small linker. Embedded in the VPR activator is a nuclear localization signal (NLS), and at the C-terminus mCherry is fused for visualization. A single guide RNA (sgRNA) is expressed by the murine U6 (mU6) promoter, and a shown stream cassette contains EF1 $\alpha$ -driven GPCR with the AVPR V2 tail fused to the TEV protease (TEVp). A BFP is fused to the C-terminus of GPCR-V2-TEVp via a p2A sequence for visualization. These plasmids are co-transfected into a stable reporter cell line containing GFP under control of the Doxycycline (Dox)-inducible TRE3G promoter. The size of the GPCR fusion protein is 2.7kb. (b) The plasmids for the GPCR-CRISPR ChaCha system. The size of the GPCR fusion protein is 8.4kb.

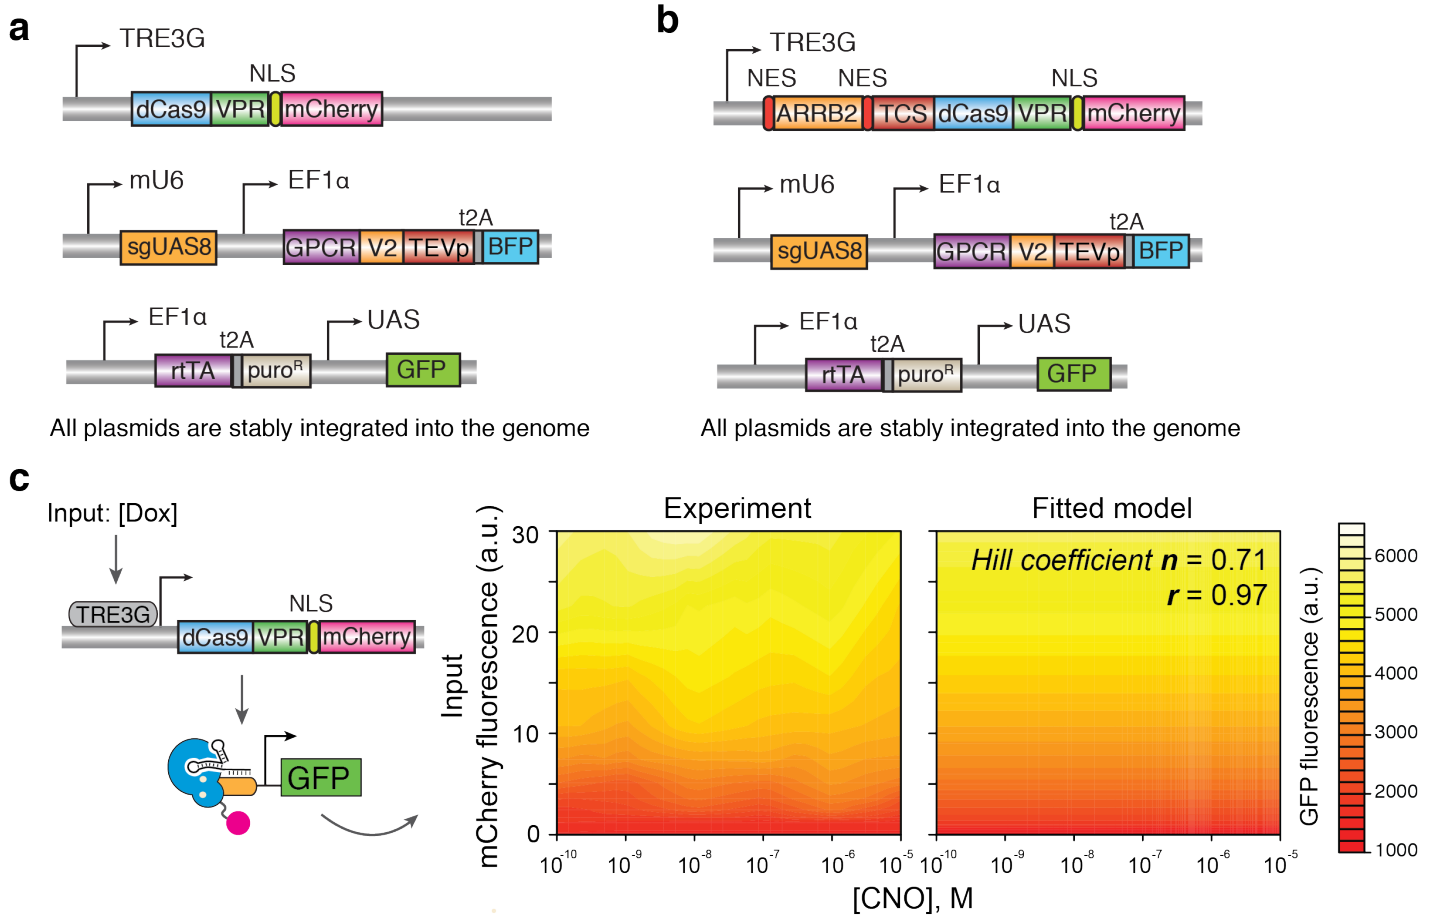

**Supplementary Figure 2 | Modeling to estimate the number of dCas9 molecules released per receptor.** (a) The plasmid system for gene activation using free dCas9-VPR. (b) The plasmid system for gene activation using the ChaCha system. (c) Measurement and modeling EGFP reporter activation via Dox-inducible dCas9-VPR-mCherry. Left, schematic of the HEK293T cell line containing genomically integrated lentiviral pTRE3G-dCas9-VPR-mCherry, pUAS-GFP-pEF1α-rtTA-p2A-puroR, and pU6-sgUAS8, see **Supplementary Table 1**. Dox induces expression of dCas9-VPR-mCherry, which with sgUAS8 binds and activates the GFP reporter. Plots demonstrate GFP fluorescence (a.u.) as a function of mCherry fluorescence (a.u., y-axis; a surrogate for Dox), and CNO concentration (M, x-axis). Both the experimental (middle) and fitted-model plots (right) demonstrate a Dox-dependent, CNO-independent graded GFP response. Model fitting using nonlinear regression indicates  $n < 1$  with correlation coefficient  $r = 0.97$  (right). See **Methods** for the detailed model.

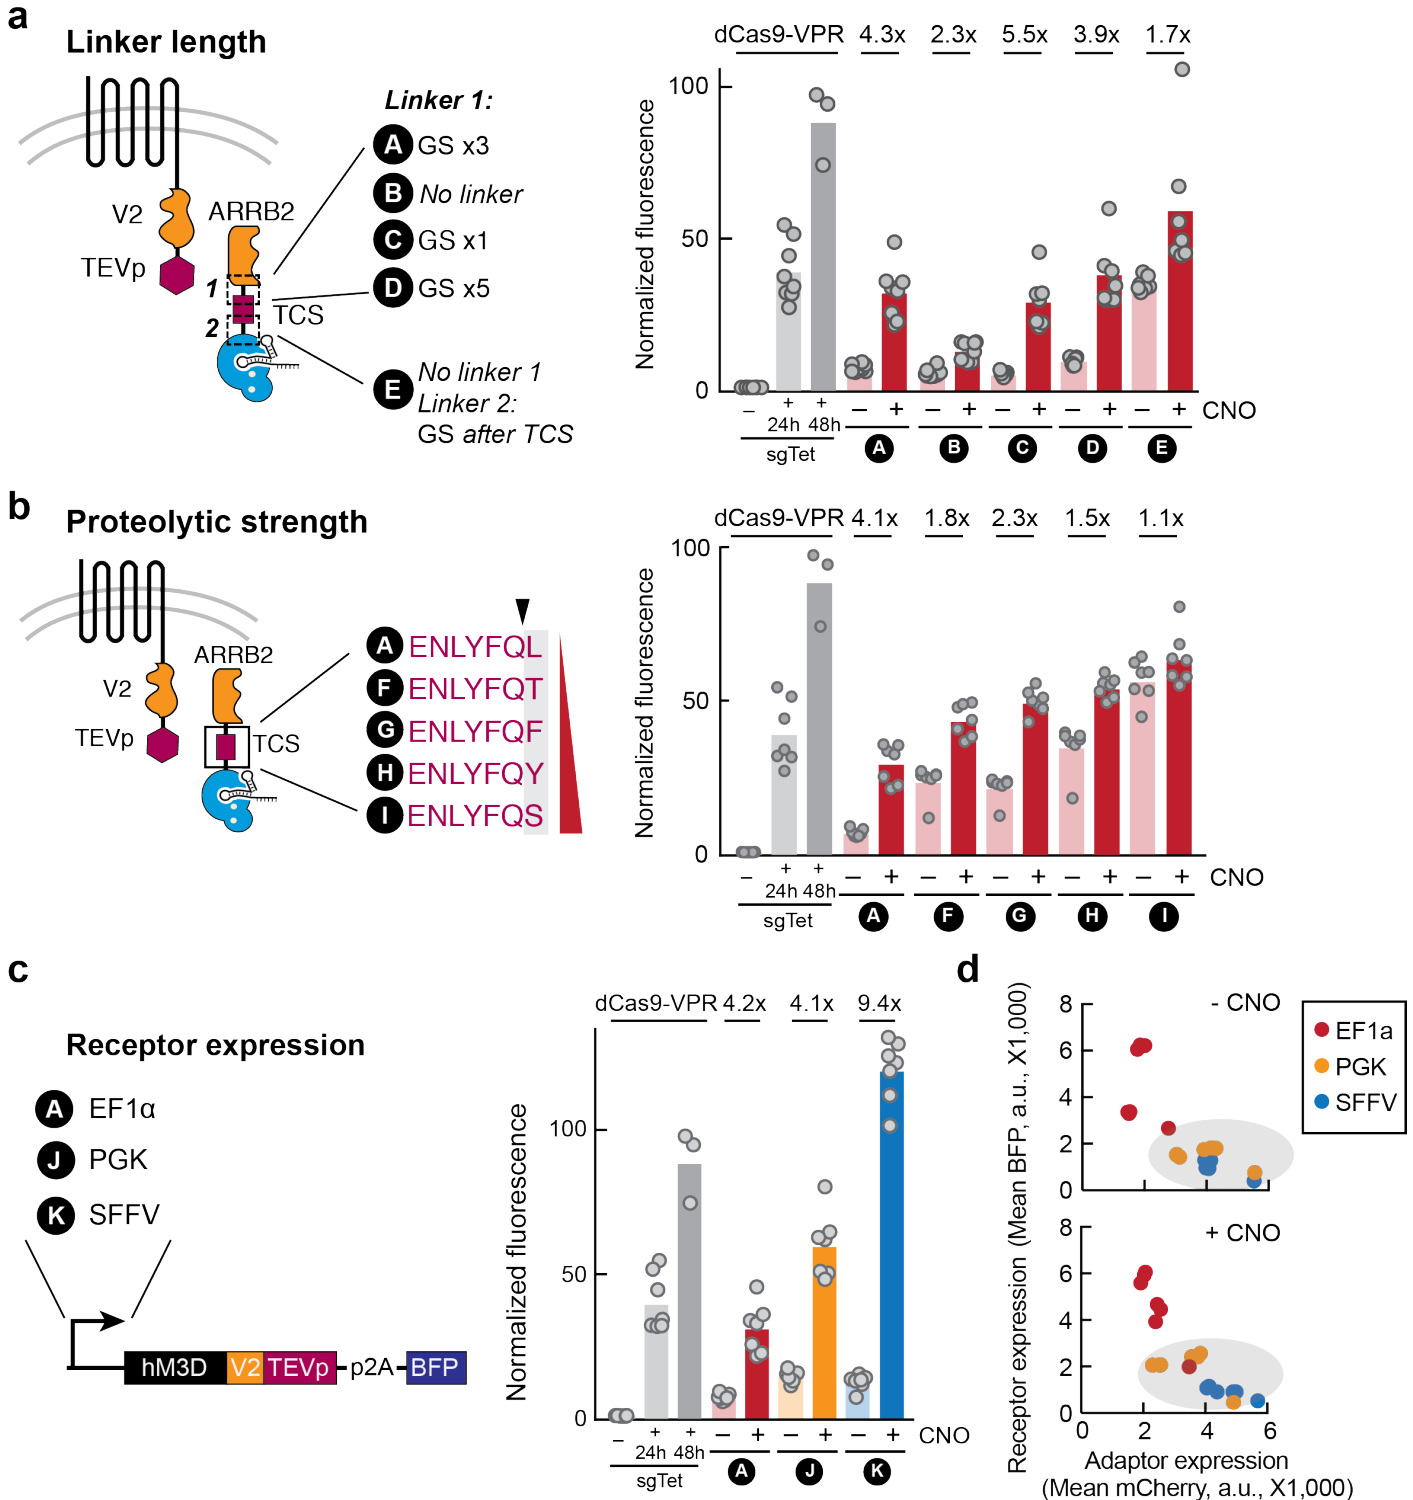

**Supplementary Figure 3 | Characterizing design parameters of hM3D-CRISPR ChaCha.** (a) Left, flexible glycine-serine (GS) linkers (variants A – E) before or after TEV cleavage site (TCS) were varied as indicated. Right, comparison of GFP activation for variants A – E, after 1 day of +/- CNO treatment. (b) Left, TCS variants F – I with increasing proteolytic strengths. Red wedge indicates increasing proteolytic cleavage efficiency. Right, comparison of GFP activation for these variants after 1 day of +/- CNO treatment. (c) Comparison of

GFP activation by receptor promoter variants (**A, J, K**) as indicated, after 1 day of +/- CNO treatment. The grey bars represent GFP activation using free dCas9-VPR with or without a targeting sgRNA (sgTet) for 24h or 48h. +/- indicates with or without CNO. The fold of activation displayed on top compares +/-CNO conditions. Data was normalized to the free dCas9-VPR without a targeting sgRNA. **(d)** Quantification of receptor (GPCR-V2-TEVp) and adaptor (ARRB2-TCS-dCas9-VPR) expression levels for BFP (receptor), mCherry (adaptor), and GFP (reporter) triple positive cells from experiments in **(c)** for with and without CNO. The data represent three independent experiments with technical replicates. The grey shaded region shows samples with a higher ratio of adaptor to receptor expression, which also show a higher dynamic range for gene activation in **(c)**.

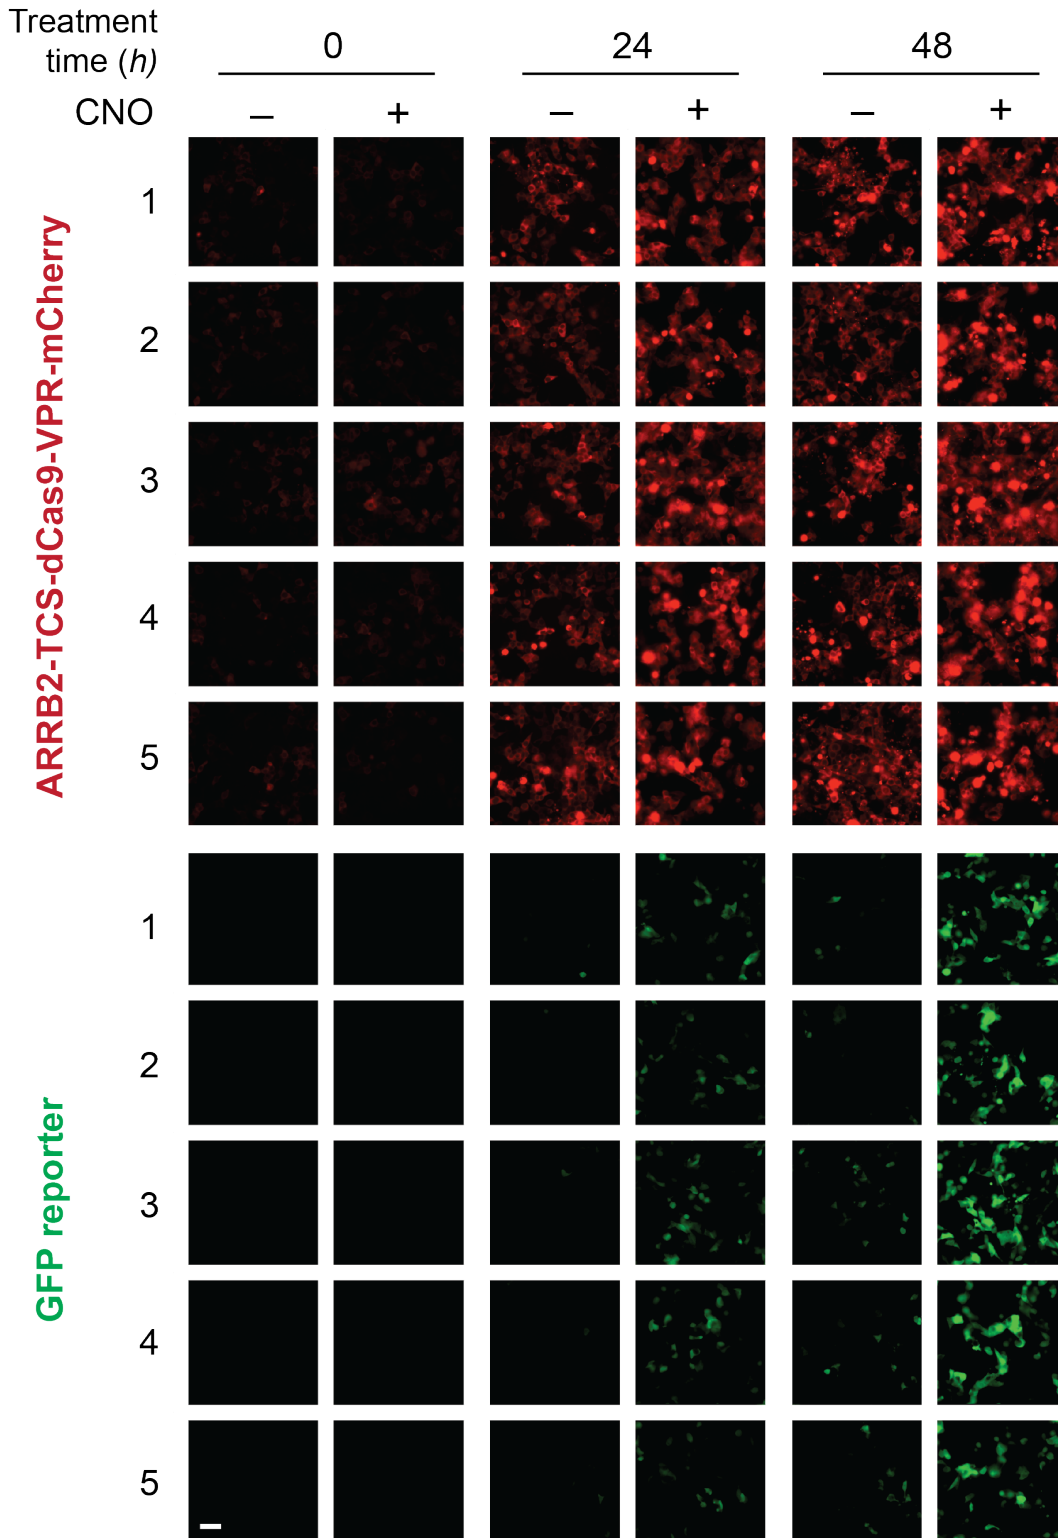

Supplementary Figure 4 | Additional fields of view from time-lapse microscopy of hM3D-CRISPR ChaCha activation in live HEK293T cells. Related to Fig. 2a and Supplementary Movies 1-3.

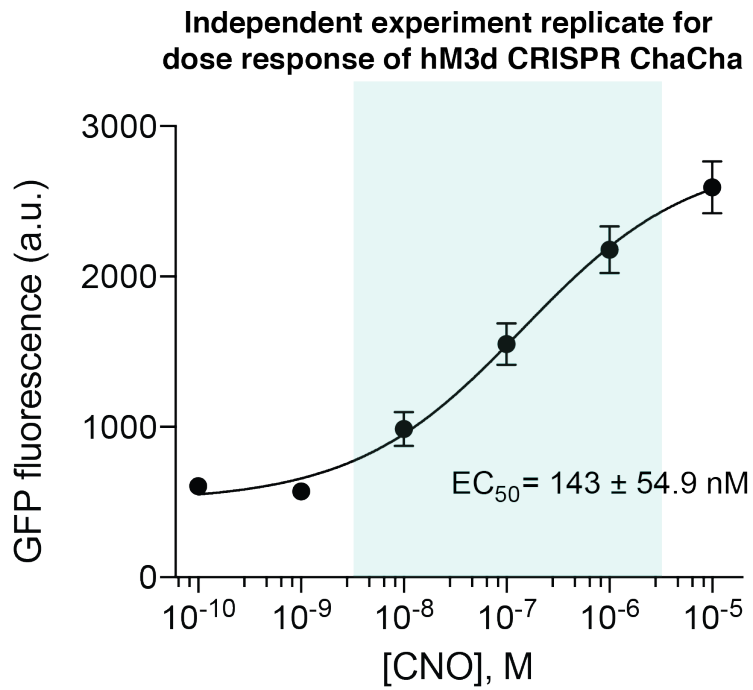

**Supplementary Figure 5 | Independent experimental replicate of the measured CNO dose response curve for the hM3D-CRISPR ChaCha. Related to Fig. 2b.**

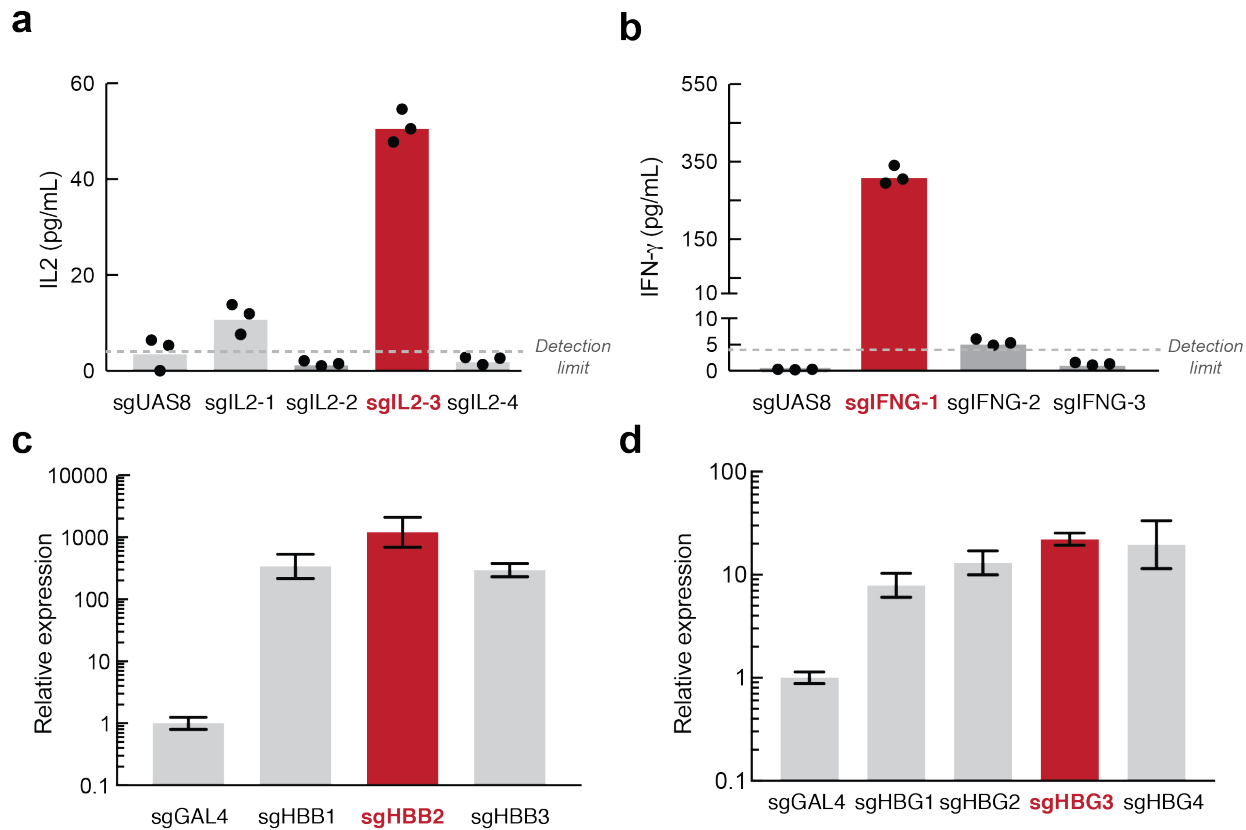

**Supplementary Figure 6 | Characterization of sgRNA efficiency for target gene activation. (a-b)** Screen of sgRNAs for IL2 and IFN- $\gamma$  cytokine activation and secretion using ELISA. sgUAS8 is used as a non-targeting control. The best performing sgRNAs (red) are used for experiments in the main text. The dotted line represents the detection limit of ELISA (4 pg/mL). **(c-d)** Screen of sgRNAs for HBB and HBG activation using qPCR. sgGAL4 was used as a non-targeting control. The best performing sgRNAs (red) were used in the main text.

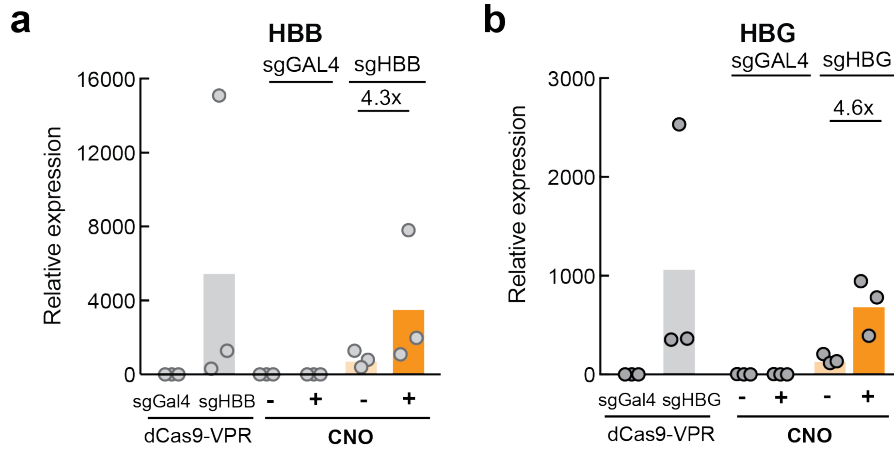

**Supplementary Figure 7 | (a-b)** Activation of HBB and HBG using the hM3D-CRISPR ChaCha system measured by quantitative PCR (qPCR) with or without 10  $\mu$ M CNO compared to positive and negative controls using free dCas9-VPR. Related to **Fig. 3b**.



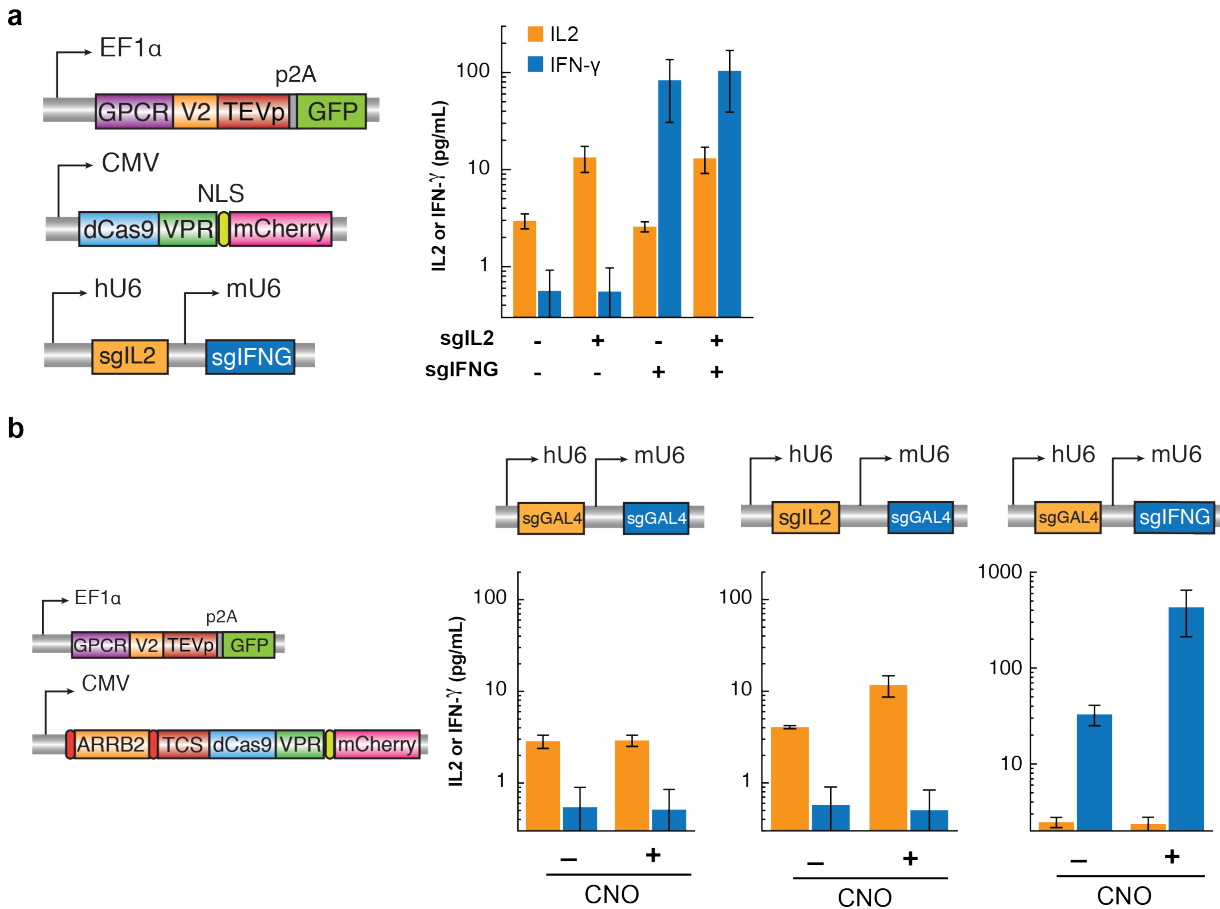

**Supplementary Figure 8 | Control experiments for the multiplexed activation of two genes using CRISPR ChaCha.** (a) The control experiment for the multiplexed activation of two endogenous genes using free dCas9-VPR. The plasmids used for the experiments are shown on the top. Measurement of IL2 (orange) and IFN- $\gamma$  (blue) by ELISA with different combinations of targeting sgRNAs is shown on the bottom. (b) The control experiment for the multiplexed activation of two endogenous genes using a non-targeting sgRNA (sgGAL4) or a single sgRNA for IL2 (sgIL2) or IFN- $\gamma$  (sgIFNG). The plasmids used for the experiments are shown on the top. Measurement of IL2 and IFN- $\gamma$  expression and secretion by ELISA with and without CNO is shown in the bottom diagrams. Related to **Fig. 3c**.

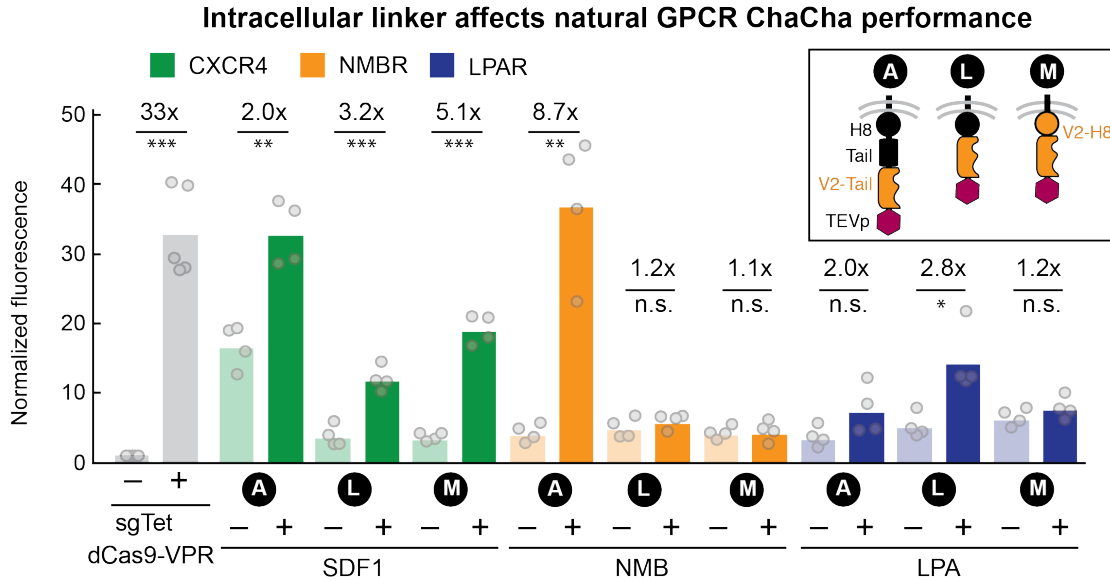

**Supplementary Figure 9 | The intracellular linker affects natural GPCR ChaCha performance.** Inset: variant A is the original ChaCha architecture; variant L is a C-terminal tail replacement with that of V2, and variant M is a C-terminal tail and H8 domain replacement to V2. The data shows GFP reporter activation measured by flow cytometry for each variant with (+) or without (-) of cognate ligands for 1 day. The free dCas9-VPR with or without a targeting sgRNA (sgTet) was used as controls. Dots represent biological measurements, and bars represent means from 2 independent experiments. The fold of activation displayed on top of bars compares +/- treatment for GPCR variants, or with or without a targeting sgRNA for the free dCas9-VPR.

Independent experiment replicate for  
dose response of NMBR CRISPR ChaCha

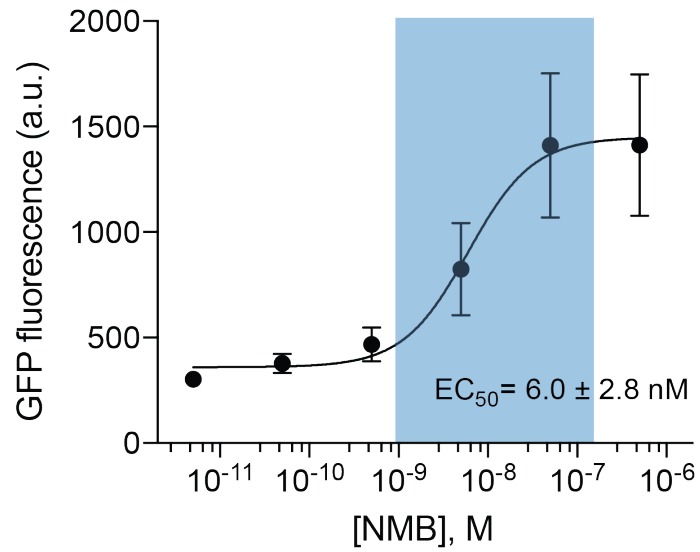

Supplementary Figure 10 | Independent experimental replicate of the measured neuromedin B dose response curve for NMBR-CRISPR ChaCha. Related to Fig. 4c.

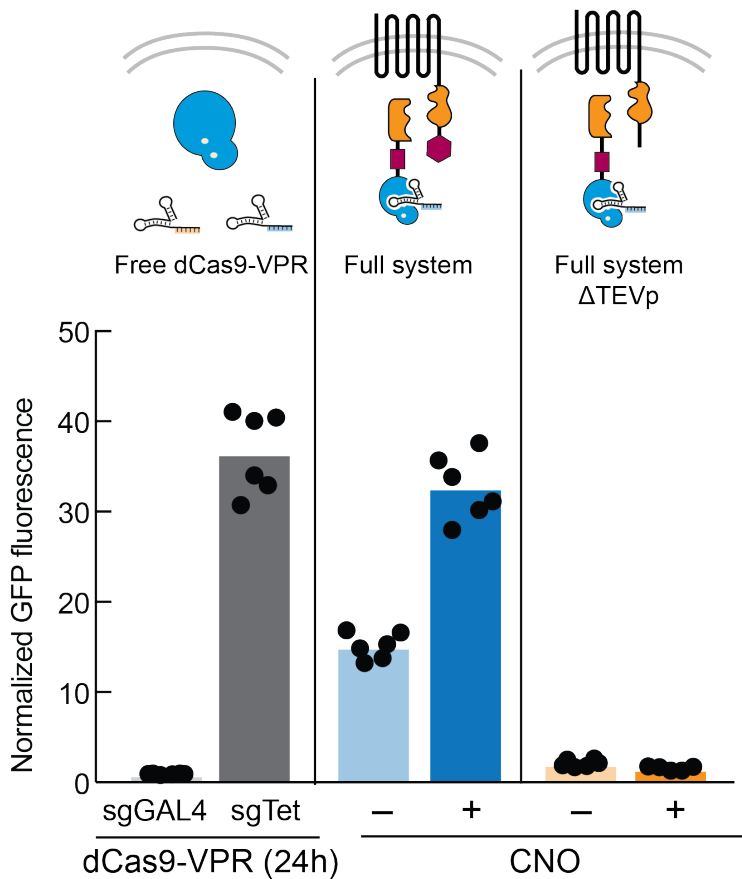

**Supplementary Figure 11 | Experimental data on characterizing the leaky activation of the ChaCha System.** (a) Expression of GFP for free dCas9-VPR with a non-targeting sgRNA (sgGAL4) or a targeting sgRNA (sgTet) 24 h after transfection (grey, left), the full ChaCha system with or without CNO (blue, middle), and the full ChaCha system with the TEVp removed from the C-terminus of the receptor (orange, right). The system used in each group is shown on top of the bars. The GFP fluorescence is normalized to the free dCas9-VPR with a non-targeting sgGAL4. Bars represent the mean, and data shown is from two independent experiments with three technical replicates.

**Supplementary Table 1.** Plasmid constructs used in this study listed by figure.

ChaCha variants are indicated in parentheses. Constructs used to generate the two reporter cell lines are described in the **Methods**.

| <b>Figure</b> | <b>Constructs</b>                                  | <b>Plasmid ID</b>                          |
|---------------|----------------------------------------------------|--------------------------------------------|
| <b>1b</b>     | pcDNA3: dCas9-VPR-mCherry                          | pSLQ3958                                   |
|               | pHR: U6-sgTET EF1a-hM3D-V2-TEV-p2a-BFP (A)         | pSLQ3956                                   |
|               | pHR: EF1a-hM3D-V2-TEV-p2a-BFP (A)                  | pSLQ5768                                   |
|               | pcDNA3: hM3D-V2-TCS-dCas9-NLS-VPR-mCherry          | pSLQ3875                                   |
|               | pHR: U6-sgTET EF1a-NES-ARRB2-NES-TEV-p2a-BFP       | pSLQ5781                                   |
|               | pcDNA3: NES-ARRB2-NES-TCS-dCas9-VPR-mCherry (A)    | pSLQ3960                                   |
| <b>1c</b>     | pHR: U6-sgUAS8 EF1a-hM3D-V2-TEV-p2a-BFP (A)        | pSLQ5779                                   |
|               | pHR: TRE3G-NES-ARRB2-NES-TCS-dCas9-VPR-mCherry (A) | pSLQ5751                                   |
|               | pHR: EF1a -rttA-p2A-Puro – WPRE UAS -GFP – bGH-pA. | pSLQ5738                                   |
| <b>2a</b>     | pHR: U6-sgTET SFFV-hM3D-V2-TEV-p2a-BFP (K)         | pSLQ5777                                   |
|               | pcDNA3: NES-ARRB2-NES-TCS-dCas9-VPR-mCherry (A)    | pSLQ3960                                   |
| <b>2b</b>     | pHR: U6-sgTET SFFV-hM3D-V2-TEV-p2a-BFP (K)         | pSLQ5777                                   |
|               | pcDNA3: NES-ARRB2-NES-TCS-dCas9-VPR-mCherry (A)    | pSLQ3960                                   |
| <b>2c</b>     | pHR: U6-sgUAS8 EF1a-hM3D-V2-TEV-p2a-BFP (A)        | pSLQ5779                                   |
|               | pHR: TRE3G-NES-ARRB2-NES-TCS-dCas9-VPR-mCherry (A) | pSLQ5751                                   |
|               | pHR: EF1a -rttA-p2A-Puro – WPRE UAS -GFP – bGH-pA. | pSLQ5738                                   |
| <b>3a</b>     | pcDNA3: dCas9-VPR-mCherry                          | pSLQ3958                                   |
|               | pHR: EF1a-hM3D-V2-linker-TEV-p2a-EGFP (A)          | pSLQ5767                                   |
|               | pcDNA3: NES-ARRB2-NES-TCS-dCas9-VPR-mCherry (A)    | pSLQ3960                                   |
|               | pHR: U6-sgGal4 EF1a-puro-t2a-BFP                   | -                                          |
|               | pHR: U6-sgIL2 EF1a-puro-t2a-BFP                    | -                                          |
|               | pHR: U6-sgIFNG EF1a-puro-t2a-BFP                   | -                                          |
| <b>3b</b>     | pcDNA3: dCas9-VPR-mCherry                          | pSLQ3958                                   |
|               | pHR: EF1a-hM3D-V2-linker-TEV-p2a-EGFP (A)          | pSLQ5767                                   |
|               | pcDNA3: NES-ARRB2-NES-TCS-dCas9-VPR-mCherry (A)    | pSLQ3960                                   |
|               | pHR: U6-sgGal4 EF1a-puro-t2a-BFP                   | -                                          |
|               | pHR: U6-sgHBB EF1a-puro-t2a-BFP                    | -                                          |
|               | pHR: U6-sgHBG EF1a-puro-t2a-BFP                    | -                                          |
| <b>3c</b>     | pcDNA3: dCas9-VPR-mCherry                          | pSLQ3958                                   |
|               | pHR: EF1a-hM3D-V2-linker-TEV-p2a-EGFP (A)          | pSLQ5767                                   |
|               | pcDNA3: NES-ARRB2-NES-TCS-dCas9-VPR-mCherry (A)    | pSLQ3960                                   |
|               | pHR: hU6-sgGal4 mU6-sgGal4 EF1a-puro-t2a-BFP       | -                                          |
|               | pHR: hU6-sgIL2 mU6-sgIFNG EF1a-puro-t2a-BFP        | -                                          |
|               | <b>4b.</b>                                         | pHR: U6-sgTET EF1a-KORD-V2-TEV-p2a-BFP (A) |
|               | pHR: U6-sgTET EF1a-LPAR1-V2-TEV-p2a-BFP (L)        | pSLQ5774                                   |
|               | pHR: U6-sgTET EF1a-CXCR4-V2-TEV-p2a-BFP (M)        | pSLQ5771                                   |

|            |                                                    |          |
|------------|----------------------------------------------------|----------|
|            | pHR: U6-sgTET EF1a-NMBR-V2-TEV-p2a-BFP (A)         | pSLQ3780 |
|            | pHR: U6-sgTET EF1a-ADRB2-V2-TEV-p2a-BFP (A)        | pSLQ5901 |
|            | pHR: U6-sgTET EF1a-AVPR2-V2-TEV-p2a-BFP (A)        | pSLQ5908 |
|            | pHR: U6-sgTET EF1a-TRHR-V2-TEV-p2a-BFP (A)         | pSLQ5909 |
|            | pcDNA3: NES-ARRB2-NES-TCS-dCas9-VPR-mCherry (A)    | pSLQ3960 |
| <b>4c</b>  | pcDNA3: NES-ARRB2-NES-TCS-dCas9-VPR-mCherry (A)    | pSLQ3960 |
|            | pHR: U6-sgTET EF1a-NMBR-V2-TEV-p2a-BFP (A)         | pSLQ3780 |
| <b>4d</b>  | pcDNA3: dCas9-VPR-mCherry                          | pSLQ3958 |
|            | pHR: EF1a-NMBR-V2-linker-TEV-p2a-EGFP (A)          | pSLQ5815 |
|            | pcDNA3: NES-ARRB2-NES-TCS-dCas9-VPR-mCherry (A)    | pSLQ3960 |
|            | pHR: U6-sgGal4 EF1a-puro-t2a-BFP                   | -        |
|            | pHR: U6-sgIFNG EF1a-puro-t2a-BFP                   | -        |
|            | <b>Supplementary Figures</b>                       |          |
| <b>S2c</b> | pHR: U6-sgUAS8 EF1a-hM3D-V2-TEV-p2a-BFP (A)        | pSLQ5779 |
|            | pHR: TRE3G-dCas9-VPR-mCherry                       | pSLQ5750 |
|            | pHR: EF1a -rttA-p2A-Puro – WPRE UAS -GFP – bGH-pA. | pSLQ5738 |
| <b>S3a</b> | pcDNA3: dCas9-VPR-mCherry                          | pSLQ3958 |
|            | pHR: U6-sgTET EF1a-hM3D-V2-TEV-p2a-BFP (A)         | pSLQ3956 |
|            | pHR: EF1a-hM3D-V2-TEV-p2a-BFP (A)                  | pSLQ5768 |
|            | pcDNA3: NES-ARRB2-NES-TCS-dCas9-VPR-mCherry (A)    | pSLQ3960 |
|            | pcDNA3: NES-ARRB2-NES-TCS-dCas9-VPR-mCherry (B)    | pSLQ5740 |
|            | pcDNA3: NES-ARRB2-NES-TCS-dCas9-VPR-mCherry (C)    | pSLQ5741 |
|            | pcDNA3: NES-ARRB2-NES-TCS-dCas9-VPR-mCherry (D)    | pSLQ5744 |
|            | pcDNA3: NES-ARRB2-NES-TCS-dCas9-VPR-mCherry (E)    | pSLQ5745 |
| <b>S3b</b> | pcDNA3: dCas9-VPR-mCherry                          | pSLQ3958 |
|            | pHR: U6-sgTET EF1a-hM3D-V2-TEV-p2a-BFP (A)         | pSLQ3956 |
|            | pHR: EF1a-hM3D-V2-TEV-p2a-BFP (A)                  | pSLQ5768 |
|            | pcDNA3: NES-ARRB2-NES-TCS-dCas9-VPR-mCherry (A)    | pSLQ3960 |
|            | pcDNA3: NES-ARRB2-NES-TCS-dCas9-VPR-mCherry (F)    | pSLQ5727 |
|            | pcDNA3: NES-ARRB2-NES-TCS-dCas9-VPR-mCherry (G)    | pSLQ5728 |
|            | pcDNA3: NES-ARRB2-NES-TCS-dCas9-VPR-mCherry (H)    | pSLQ5729 |
|            | pcDNA3: NES-ARRB2-NES-TCS-dCas9-VPR-mCherry (I)    | pSLQ5730 |
| <b>S3c</b> | pcDNA3: dCas9-VPR-mCherry                          | pSLQ3958 |
|            | pHR: U6-sgTET EF1a-hM3D-V2-TEV-p2a-BFP (A)         | pSLQ3956 |
|            | pHR: EF1a-hM3D-V2-TEV-p2a-BFP (A)                  | pSLQ5768 |
|            | pcDNA3: NES-ARRB2-NES-TCS-dCas9-VPR-mCherry (A)    | pSLQ3960 |
|            | pHR: U6-sgTET PGK-hM3D-V2-TEV-p2a-BFP (J)          | pSLQ5776 |
|            | pHR: U6-sgTET SFFV-hM3D-V2-TEV-p2a-BFP (K)         | pSLQ5777 |
| <b>S4</b>  | pHR: U6-sgTET SFFV-hM3D-V2-TEV-p2a-BFP (K)         | pSLQ5777 |
|            | pcDNA3: NES-ARRB2-NES-TCS-dCas9-VPR-mCherry (A)    | pSLQ3960 |
| <b>S5</b>  | pHR: U6-sgTET SFFV-hM3D-V2-TEV-p2a-BFP (K)         | pSLQ5777 |
|            | pcDNA3: NES-ARRB2-NES-TCS-dCas9-VPR-mCherry (A)    | pSLQ3960 |

|            |                                                 |          |
|------------|-------------------------------------------------|----------|
| <b>S6a</b> | pcDNA3: dCas9-VPR-mCherry                       | pSLQ3958 |
|            | pHR: U6-sgUAS8 EF1a-puro-t2a-BFP                | -        |
|            | pHR: U6-sgIL2-1 EF1a-puro-t2a-BFP               | -        |
|            | pHR: U6-sgIL2-2 EF1a-puro-t2a-BFP               | -        |
|            | pHR: U6-sgIL2-3 EF1a-puro-t2a-BFP               | -        |
|            | pHR: U6-sgIL2-4 EF1a-puro-t2a-BFP               | -        |
| <b>S6b</b> | pcDNA3: dCas9-VPR-mCherry                       | pSLQ3958 |
|            | pHR: U6-sgIFNG-1 EF1a-puro-t2a-BFP              | -        |
|            | pHR: U6-sgIFNG-2 EF1a-puro-t2a-BFP              | -        |
|            | pHR: U6-sgIFNG-3 EF1a-puro-t2a-BFP              | -        |
| <b>S7</b>  | pcDNA3: dCas9-VPR-mCherry                       | pSLQ3958 |
|            | pHR: U6-sgGAL4 EF1a-puro-t2a-BFP                | -        |
|            | pHR: U6-sgHBB2 EF1a-puro-t2a-BFP                |          |
|            | pHR: U6-sgHBG3 EF1a-puro-t2a-BFP                |          |
|            | pHR: EF1a-hM3D-V2-linker-TEV-p2a-EGFP (A)       | pSLQ5767 |
|            | pcDNA3: NES-ARRB2-NES-TCS-dCas9-VPR-mCherry (A) | pSLQ3960 |
| <b>S8a</b> | pcDNA3: dCas9-VPR-mCherry                       | pSLQ3958 |
|            | pHR: hU6-sgGal4 mU6-sgGal4 EF1a-puro-t2a-BFP    |          |
|            | pHR: hU6-sgIL2 mU6-sgGal4 EF1a-puro-t2a-BFP     |          |
|            | pHR: hU6-sgGal4 mU6-sgIFNG EF1a-puro-t2a-BFP    |          |
|            | pHR: hU6-sgIL2 mU6-sgIFNG EF1a-puro-t2a-BFP     |          |
|            | pHR: EF1a-hM3D-V2-linker-TEV-p2a-EGFP (A)       | pSLQ5767 |
| <b>S8b</b> | pcDNA3: NES-ARRB2-NES-TCS-dCas9-VPR-mCherry (A) | pSLQ3960 |
|            | pHR: hU6-sgGal4 mU6-sgGal4 EF1a-puro-t2a-BFP    |          |
|            | pHR: hU6-sgIL2 mU6-sgGal4 EF1a-puro-t2a-BFP     |          |
|            | pHR: hU6-sgGal4 mU6-sgIFNG EF1a-puro-t2a-BFP    |          |
|            | pHR: hU6-sgIL2 mU6-sgIFNG EF1a-puro-t2a-BFP     |          |
| <b>S9</b>  | pcDNA3: dCas9-VPR-mCherry                       | pSLQ3958 |
|            | pHR: EF1a-hM3D-V2-TEV-p2a-BFP (A)               | pSLQ5768 |
|            | pcDNA3: NES-ARRB2-NES-TCS-dCas9-VPR-mCherry (A) | pSLQ3960 |
|            | pHR: U6-sgTET EF1a-CXCR4-V2-TEV-p2a-BFP (A)     | pSLQ3779 |
|            | pHR: U6-sgTET EF1a-CXCR4-V2-TEV-p2a-BFP (L)     | pSLQ5770 |
|            | pHR: U6-sgTET EF1a-CXCR4-V2-TEV-p2a-BFP (M)     | pSLQ5771 |
|            | pHR: U6-sgTET EF1a-NMBR-V2-TEV-p2a-BFP (A)      | pSLQ3780 |
|            | pHR: U6-sgTET EF1a-NMBR-V2-TEV-p2a-BFP (L)      | pSLQ5772 |
|            | pHR: U6-sgTET EF1a-NMBR-V2-TEV-p2a-BFP (M)      | pSLQ5773 |
|            | pHR: U6-sgTET EF1a-LPAR1-V2-TEV-p2a-BFP (A)     | pSLQ3781 |
|            | pHR: U6-sgTET EF1a-LPAR1-V2-TEV-p2a-BFP (L)     | pSLQ5774 |
|            | pHR: U6-sgTET EF1a-LPAR1-V2-TEV-p2a-BFP (M)     | pSLQ5775 |
| <b>S10</b> | pcDNA3: NES-ARRB2-NES-TCS-dCas9-VPR-mCherry (A) | pSLQ3960 |
|            | pHR: U6-sgTET EF1a-NMBR-V2-TEV-p2a-BFP (A)      | pSLQ3780 |
| <b>S11</b> | pcDNA3: dCas9-VPR-mCherry                       | pSLQ3958 |
|            | pHR: U6-sgTET EF1a-puro-t2a-BFP                 |          |

|  |                                                 |          |
|--|-------------------------------------------------|----------|
|  | pHR: U6-sgGal4 EF1a-puro-t2a-BFP                |          |
|  | pHR: U6-sgTET EF1a-hM3D-V2-TEV-p2a-BFP (A)      | pSLQ3956 |
|  | pcDNA3: NES-ARRB2-NES-TCS-dCas9-VPR-mCherry (A) | pSLQ3960 |
|  | pHR: U6-sgTET EF1a-hM3D-V2-p2a-BFP (A)          | pSLQ5725 |



**Supplementary Table 2:** Sequences for *S. pyogenes* sgRNAs used in the study.

| Name     | Spacer Sequence          |
|----------|--------------------------|
| sgTET    | GTACGTTCTCTATCACTGATA    |
| sgGAL4   | GAGCACTGTCCTCCGAACGT     |
| sgUAS8   | GTACTCCGACCTCTAGTGT      |
| sgIL2-1  | GTGATTAAGAGAGTGATA       |
| sgIL2-2  | GCAATTTATACTGTTAATTC     |
| sgIL2-3  | GTTACATTAGCCCACACTT      |
| sgIL2-4  | GAAAACTGTTTCATACAGA      |
| sgIFNG-1 | GAGATGGTGACAGATAGGCA     |
| sgIFNG-2 | GAATGGCACAGGTGGGCATAA    |
| sgIFNG-3 | GTACCTCCCCACTTCGCCC      |
| sgHBB1   | GTGGAGCCACACCCTAGGGT     |
| sgHBB2   | GAAGAGCCAAGGACAGGTA      |
| sgHBB3   | GTACCTGTCCTTGGCTCTTC     |
| HBG1     | GTCAAGGCAAGGCTGGCCAACCCA |
| HBG2     | GCTATTGGTCAAGGCAAGGC     |
| HBG3     | GCTAAACTCCACCCATGGGT     |
| HBG4     | GATATTTGCATTGAGATAGTG    |

**Supplementary Table 3.** cDNA resources used for receptor cloning.

| <b>Receptor cDNA</b> | <b>Repository</b>                                                       | <b>Catalogue No.</b> |
|----------------------|-------------------------------------------------------------------------|----------------------|
| hM3D                 | Addgene                                                                 | 45547                |
| KORD                 | Addgene                                                                 | 65417                |
| CXCR4                | Addgene                                                                 | 66262                |
| LPAR1                | Addgene                                                                 | 66418                |
| NMBR                 | Addgene                                                                 | 66445                |
| ADRB2                | Addgene                                                                 | 66220                |
| TRHR                 | cDNA Resource Center ( <a href="http://www.cdna.org">www.cdna.org</a> ) | TRHR000000           |
| AVPR2                | Addgene                                                                 | 66227                |

**Supplementary Table 4.** GPCR ligands used.

| <b>Receptor</b> | <b>Ligand</b>                        | <b>Concentration</b> | <b>Manufacturer</b> | <b>Catalogue No.</b> | <b>Media Conditions</b> |
|-----------------|--------------------------------------|----------------------|---------------------|----------------------|-------------------------|
| hM3D            | Clozapine N-Oxide (CNO)              | 20 $\mu$ M           | Sigma               | C0832                | Full Serum              |
| KORD            | Salvinorin B (SALB)                  | 2 $\mu$ M            | Tocris              | 5611                 | Full Serum              |
| CXCR4           | Stromal-cell Derived Factor 1 (SDF1) | 0.05 $\mu$ M         | BioLegend           | 581204               | Serum Free              |
| LPAR1           | Lysophosphatidic acid (LPA)          | 10 $\mu$ M           | Santa Cruz Biotech  | sc-201053            | Serum Free              |
| NMBR            | Neuromedin B (NMB)                   | 1 $\mu$ M            | Tocris              | 1908                 | Serum Free              |
| ADRB2           | Isoproterenol HCL (ISO)              | 10 $\mu$ M           | Tocris              | 1747                 | Full Serum              |
| TRHR            | Thyrotropin Releasing Hormone (TRH)  | 10 $\mu$ M           | Sigma               | P1319-50MG           | Full Serum              |
| AVPR2           | Arg8- Vassopressin (AVP)             | 10 $\mu$ M           | Tocris              | 2935                 | Full Serum              |

**Supplementary Table 5.** Primers used for qPCR

| <b>qPCR Primer</b> | <b>Sequence</b>          |
|--------------------|--------------------------|
| GAPDH.F            | TGCCAAATATGATGACATCAAGAA |
| GAPDH.R            | GGAGTGGGTGTCGCTGTTGC     |
| HBG.F              | GCTGAGTGAAGTGCCTGTGA     |
| HBG.R              | GAATTCTTTGCCGAAATGGA     |
| HBB.F              | GCACGTGGATCCTGAGAACT     |
| HBB.R              | ATTGGACAGCAAGAAAGCGAG    |

**Supplementary Table 6.** Statistical Analyses of Experimental Data

See Figure Legends and **Methods** for descriptions of statistical tests used. Fold changes are mean values that are reflected in the figures. Statistically significant differences ( $P < 0.05$ ) are **bolded**.

| Figure | Condition 1                        | Condition 2                        | Fold    | P-value           |
|--------|------------------------------------|------------------------------------|---------|-------------------|
| 1b     | dCas9-VPR (N)                      | dCas9-VPR (T)                      | 31      | <b>0.002</b>      |
|        | hM3D Tango (- CNO)                 | hM3D Tango (+ CNO)                 | 1.2     | 0.216             |
|        | hM3D ChaCha (- CNO)                | hM3D ChaCha (+ CNO)                | 4.4     | <b>&lt;0.001</b>  |
| 3a     | dCas9-VPR (sgGal4)                 | dCas9-VPR (sgIL2)                  | >11*    | <b>&lt;0.001</b>  |
|        | hM3D ChaCha (sgGal4, - CNO)        | hM3D ChaCha (sgGal4, + CNO)        | b.d.l.* | -                 |
|        | hM3D ChaCha (sgIL2, - CNO)         | hM3D ChaCha (sgIL2, + CNO)         | 3.4     | <b>&lt;0.001</b>  |
|        | dCas9-VPR (sgGal4)                 | dCas9-VPR (sgIFNG)                 | >92*    | <b>&lt;0.001</b>  |
|        | hM3D ChaCha (sgGal4, - CNO)        | hM3D ChaCha (sgGal4, + CNO)        | b.d.l.* | -                 |
|        | hM3D ChaCha (sgIFNG, - CNO)        | hM3D ChaCha (sgIFNG, + CNO)        | 11      | <b>&lt;0.001</b>  |
| 3b     | hM3D ChaCha (sgGal4, - CNO)        | hM3D ChaCha (sgGal4, + CNO)        | 1.59    | -                 |
|        | hM3D ChaCha (sgHBB, - CNO)         | hM3D ChaCha (sgHBB, + CNO)         | 4.3     | 0.351             |
|        | hM3D ChaCha (sgGal4, - CNO)        | hM3D ChaCha (sgGal4, + CNO)        | 1.25    | -                 |
|        | hM3D ChaCha (sgHBG, - CNO)         | hM3D ChaCha (sgHBG, + CNO)         | 4.6     | 0.0743            |
| 3c     | hM3D ChaCha (sgIL2/sgIFNG, - CNO)  | hM3D ChaCha (sgIL2/sgIFNG,, + CNO) | 3.3     | <b>&lt;0.0001</b> |
|        | hM3D ChaCha (sgIL2/sgIFNG, - CNO)  | hM3D ChaCha (sgIL2/sgIFNG,, + CNO) | 11      | <b>0.0002</b>     |
| 4a     | KORD ChaCha (-SALB)                | KORD ChaCha (+SALB)                | 6.4     | <b>&lt;0.001</b>  |
|        | LPAR1 ChaCha (- LPA)<br>Variant L  | hM3D ChaCha (+ LPA)<br>Variant L   | 2.8     | <b>0.024</b>      |
|        | CXCR4 ChaCha (- SDF1)<br>Variant M | CXCR4 ChaCha (+ SDF1)<br>Variant M | 5.1     | <b>&lt;0.001</b>  |
|        | NMBR ChaCha (- NMB)                | NMBR ChaCha (+ NMB)                | 8.7     | <b>0.007</b>      |

|     |                              |                              |       |                   |
|-----|------------------------------|------------------------------|-------|-------------------|
|     | Variant A                    | Variant A                    |       |                   |
|     | ADRB2 ChaCha (-ISO)          | ADRB2 ChaCha (+ISO)          | 4.0   | <b>0.0027</b>     |
|     | AVPR2 ChaCha (-AVP)          | AVPR2 ChaCha (+AVP)          | 3.1   | <b>&lt;0.0001</b> |
|     | TRHR ChaCha (-TRH)           | TRHR ChaCha (+TRH)           | 3.9   | <b>&lt;0.0001</b> |
|     | dCas9-VPR (sgGal4)           | dCas9-VPR (sgIFNG)           | >97   | <b>&lt;0.001</b>  |
| 4d  | NMBR ChaCha (sgGal4, - NMB)  | NMBR ChaCha (sgGal4, + NMB)  | n.d.* | -                 |
|     | NMBR ChaCha (sgIFNG, - NMB)  | NMBR ChaCha (sgIFNG, + NMB)  | 20    | <b>0.009</b>      |
| S1a | dCas9-VPR (N)                | dCas9-VPR (T), 24 hrs        | 39    | <b>&lt;0.0001</b> |
|     | dCas9-VPR (N)                | dCas9-VPR (T), 48 hrs        | 89    | <b>0.0067</b>     |
|     | hM3D ChaCha Variant A (-CNO) | hM3D ChaCha Variant A (+CNO) | 4.3   | <b>&lt;0.0001</b> |
|     | hM3D ChaCha Variant B (-CNO) | hM3D ChaCha Variant B (+CNO) | 2.3   | <b>0.0001</b>     |
|     | hM3D ChaCha Variant C (-CNO) | hM3D ChaCha Variant C (+CNO) | 5.5   | <b>0.0003</b>     |
|     | hM3D ChaCha Variant D (-CNO) | hM3D ChaCha Variant D (+CNO) | 3.9   | <b>0.0004</b>     |
|     | hM3D ChaCha Variant E (-CNO) | hM3D ChaCha Variant E (+CNO) | 1.7   | <b>0.0278</b>     |
| S1b | dCas9-VPR (N)                | dCas9-VPR (T), 24 hrs        | 39    | <b>&lt;0.0001</b> |
|     | dCas9-VPR (N)                | dCas9-VPR (T), 48 hrs        | 89    | <b>0.0067</b>     |
|     | hM3D ChaCha Variant A (-CNO) | hM3D ChaCha Variant A (+CNO) | 4.1   | <b>&lt;0.0001</b> |
|     | hM3D ChaCha Variant F (-CNO) | hM3D ChaCha Variant F (+CNO) | 1.8   | <b>&lt;0.0001</b> |
|     | hM3D ChaCha Variant G (-CNO) | hM3D ChaCha Variant G (+CNO) | 2.3   | <b>0.0002</b>     |

|     |                              |                              |         |                   |
|-----|------------------------------|------------------------------|---------|-------------------|
|     | hM3D ChaCha Variant H (-CNO) | hM3D ChaCha Variant H (+CNO) | 1.5     | <b>&lt;0.0001</b> |
|     | hM3D ChaCha Variant I (-CNO) | hM3D ChaCha Variant I (+CNO) | 1.1     | 0.1124            |
| S1c | dCas9-VPR (N)                | dCas9-VPR (T), 24 hrs        | 39      | <b>&lt;0.0001</b> |
|     | dCas9-VPR (N)                | dCas9-VPR (T), 48 hrs        | 89      | <b>0.0067</b>     |
|     | hM3D ChaCha Variant A (-CNO) | hM3D ChaCha Variant A (+CNO) | 4.2     | <b>0.0003</b>     |
|     | hM3D ChaCha Variant J (-CNO) | hM3D ChaCha Variant J (+CNO) | 4.1     | <b>&lt;0.0001</b> |
|     | hM3D ChaCha Variant K (-CNO) | hM3D ChaCha Variant K (+CNO) | 9.4     | <b>&lt;0.0001</b> |
| S6a | dCas9-VPR (sgUAS8)           | dCas9-VPR (sgIL2-1)          | 2.1     | -                 |
|     | dCas9-VPR (sgUAS8)           | dCas9-VPR (sgIL2-2)          | b.d.l.* | -                 |
|     | dCas9-VPR (sgUAS8)           | dCas9-VPR (sgIL2-3)          | 9.7     | -                 |
|     | dCas9-VPR (sgUAS8)           | dCas9-VPR (sgIL2-4)          | b.d.l.* | -                 |
| S6b | dCas9-VPR (sgUAS8)           | dCas9-VPR (sgIFNG-1)         | 78      | -                 |
|     | dCas9-VPR (sgUAS8)           | dCas9-VPR (sgIFNG-2)         | -       | -                 |
|     | dCas9-VPR (sgUAS8)           | dCas9-VPR (sgIFNG-3)         | b.d.l.* | -                 |
| S6c | dCas9-VPR (sgGAL4)           | dCas9-VPR (sgHBB-1)          | 340     | -                 |
|     | dCas9-VPR (sgGAL4)           | dCas9-VPR (sgHBB-2)          | 1204    | -                 |
|     | dCas9-VPR (sgGAL4)           | dCas9-VPR (sgHBB-3)          | 292     | -                 |
|     | dCas9-VPR (sgGAL4)           | dCas9-VPR (sgHBG-1)          | 7.8     | -                 |
|     | dCas9-VPR (sgGAL4)           | dCas9-VPR (sgHBG-2)          | 12.9    | -                 |
|     | dCas9-VPR (sgGAL4)           | dCas9-VPR (sgHBG-3)          | 22.1    | -                 |
|     | dCas9-VPR (sgGAL4)           | dCas9-VPR (sgHBG-4)          | 19.5    | -                 |
| S7a | dCas9 VPR (sgGal4)           | dCas9 VPR (sgHBB)            | 5560    | 0.0783            |
|     | hM3D ChaCha (sgGal4, - CNO)  | hM3D ChaCha (sgGal4, + CNO)  | -       | -                 |
|     | hM3D ChaCha                  | hM3D ChaCha                  | 4.3     | 0.0510            |

|     | (sgHBB, - CNO)                     | (sgHBB, + CNO)                                              |         |                   |
|-----|------------------------------------|-------------------------------------------------------------|---------|-------------------|
| S7b | dCas9 VPR (sgGal4)                 | dCas9 VPR (sgHBG)                                           | 1083    | <b>0.0323</b>     |
|     | hM3D ChaCha (sgGal4, - CNO)        | hM3D ChaCha (sgGal4, + CNO)                                 | -       | -                 |
|     | hM3D ChaCha (sgHBG, - CNO)         | hM3D ChaCha (sgHBG, + CNO)                                  | 4.6     | <b>0.0003</b>     |
| S8a | dCas9 VPR (sgGal4/sgGal4)          | dCas9 VPR (sgIL2/sgGal4)<br>For IL2 measurements            | 3.3     | <b>&lt;0.0001</b> |
|     | dCas9 VPR (sgGal4/sgGal4)          | dCas9 VPR (sgGal4/sgIFNG)<br>For IL2 measurements           | b.d.l.* | -                 |
|     | dCas9 VPR (sgGal4/sgGal4)          | dCas9 VPR (sgIL2/sgIFNG)<br>For IL2 measurements            | 3.27    | <b>&lt;0.0001</b> |
|     | dCas9 VPR (sgGal4/sgGal4)          | dCas9 VPR (sgIL2/sgGal4)<br>For IFNG measurements           | b.d.l.* | -                 |
|     | dCas9 VPR (sgGal4/sgGal4)          | dCas9 VPR (sgGal4/sgIFNG)<br>For IFNG measurements          | 20.7    | <b>0.0018</b>     |
|     | dCas9 VPR (sgGal4/sgGal4)          | dCas9 VPR (sgIL2/sgIFNG)<br>For IFNG measurements           | 25      | <b>0.0014</b>     |
| S8b | hM3D ChaCha (sgGal4/sgGal4, - CNO) | hM3D ChaCha (sgGal4/sgGal4, + CNO)<br>For IL2 Measurements  | b.d.l.* | -                 |
|     | hM3D ChaCha (sgIL2/sgGal4, - CNO)  | hM3D ChaCha (sgIL2/sgGal4, -+CNO)<br>For IL2 Measurements   | 2.8     | <b>&lt;0.0001</b> |
|     | hM3D ChaCha (sgGal4/sgIFNG, - CNO) | hM3D ChaCha (sgGal4/sgIFNG, + CNO)<br>For IL2 Measurements  | b.d.l.* | -                 |
|     | hM3D ChaCha (sgIL2/sgIFNG, - CNO)  | hM3D ChaCha (sgIL2/sgIFNG, + CNO)<br>For IL2 Measurements   | 3.3     | <b>&lt;0.0001</b> |
|     | hM3D ChaCha (sgGal4/sgGal4, - CNO) | hM3D ChaCha (sgGal4/sgGal4, + CNO)<br>For IFNG Measurements | b.d.l.* | -                 |
|     | hM3D ChaCha (sgIL2/sgGal4, - CNO)  | hM3D ChaCha (sgIL2/sgGal4, -+CNO)<br>For IFNG Measurements  | b.d.l.* | -                 |
|     | hM3D ChaCha (sgGal4/sgIFNG, - CNO) | hM3D ChaCha (sgGal4/sgIFNG, + CNO)<br>For IFNG Measurements | 11      | <b>0.0006</b>     |



|     |                                      |                                                               |      |                   |
|-----|--------------------------------------|---------------------------------------------------------------|------|-------------------|
|     | hM3D ChaCha<br>(sgIL2/sgIFNG, - CNO) | hM3D ChaCha<br>(sgIL2/sgIFNG, + CNO)<br>For IFNG Measurements | 13   | <b>0.0002</b>     |
| S9  | dCas9-VPR (N)                        | dCas9-VPR (T)                                                 | 33x  | <b>0.0004</b>     |
|     | CXCR4 ChaCha (- SDF1)<br>Variant A   | CXCR4 ChaCha (+ SDF1)<br>Variant A                            | 2.0  | <b>0.0018</b>     |
|     | CXCR4 ChaCha (- SDF1)<br>Variant L   | CXCR4 ChaCha (+ SDF1)<br>Variant L                            | 3.3  | <b>0.0005</b>     |
|     | CXCR4 ChaCha (- SDF1)<br>Variant M   | CXCR4 ChaCha (+ SDF1)<br>Variant M                            | 5.1  | <b>0.0003</b>     |
|     | NMBR ChaCha (- NMB)<br>Variant A     | NMBR ChaCha (+ NMB)<br>Variant A                              | 8.7  | <b>0.0069</b>     |
|     | NMBR ChaCha (- NMB)<br>Variant L     | NMBR ChaCha (+ NMB)<br>Variant L                              | 1.2  | 0.2908            |
|     | NMBR ChaCha (- NMB)<br>Variant M     | NMBR ChaCha (+ NMB)<br>Variant M                              | 1.1  | 0.7922            |
|     | LPAR ChaCha (- NMB)<br>Variant A     | LPAR ChaCha (+ NMB)<br>Variant A                              | 2.0  | 0.1212            |
|     | LPAR ChaCha (- NMB)<br>Variant L     | LPAR ChaCha (+ NMB)<br>Variant L                              | 2.8  | <b>0.0245</b>     |
|     | LPAR ChaCha (- NMB)<br>Variant M     | LPAR ChaCha (+ NMB)<br>Variant M                              | 1.2  | 0.2483            |
| S11 | dCas9-VPR (sgGal4)                   | dCas9-VPR (sgTet)                                             | 39   | <b>&lt;0.0001</b> |
|     | hM3D ChaCha (- CNO)                  | hM3D ChaCha (+ CNO)                                           | 2.16 | <b>&lt;0.0001</b> |
|     | hM3D ChaCha $\Delta$ TEVp (-CNO)     | hM3D ChaCha $\Delta$ TEVp (+CNO)                              | 0.74 | <b>0.0197</b>     |

\*For ELISA values below the detection limit of 4 pg/mL, fold changes are estimates compared to that limit; b.d.l., below detectable limit. For sgRNA screening, where only one experiment with technical replicates were performed, only fold change is reported.
